# Supplementary material
Source: MDPI journal article supplement (https://www.mdpi.com/2072-4292/15/21/5204)
Supplement: s1 [file s1]

## Supplementary Information

### Crowd-driven deep learning tracks Amazon deforestation

<sup>1</sup>*McCallum, Ian*

<sup>2</sup>*Walker, Jon*

<sup>1</sup>*Fritz, Steffen*

<sup>3</sup>*Grau, Markus*

<sup>2</sup>*Hannan, Cassie*

<sup>2</sup>*Hsieh, I-Sah*

<sup>2</sup>*Lape, Deanna*

<sup>2</sup>*Mahone, Jen*

<sup>2</sup>*McLester, Caroline*

<sup>2</sup>*Mellgren, Steve*

<sup>2</sup>*Piland, Nolan*

<sup>1</sup>*See, Linda*

<sup>4</sup>*Svolba, Gerhard*

<sup>5</sup>*de Villiers, Murray*

<sup>1</sup> International Institute for Applied Systems Analysis, Laxenburg, Austria

<sup>2</sup> SAS Campus Drive, Cary, NC 27513, United States

<sup>3</sup> SAS Institute AG, Richtistrasse 11, 8304 Wallisellen, Switzerland

<sup>4</sup> SAS Austria, Trabrennstrasse 2B, 1020 Wien, Austria

<sup>5</sup> SAS Netherlands B.V. Flevolaan 69, 1272 PC Huizen, Netherlands

## Results

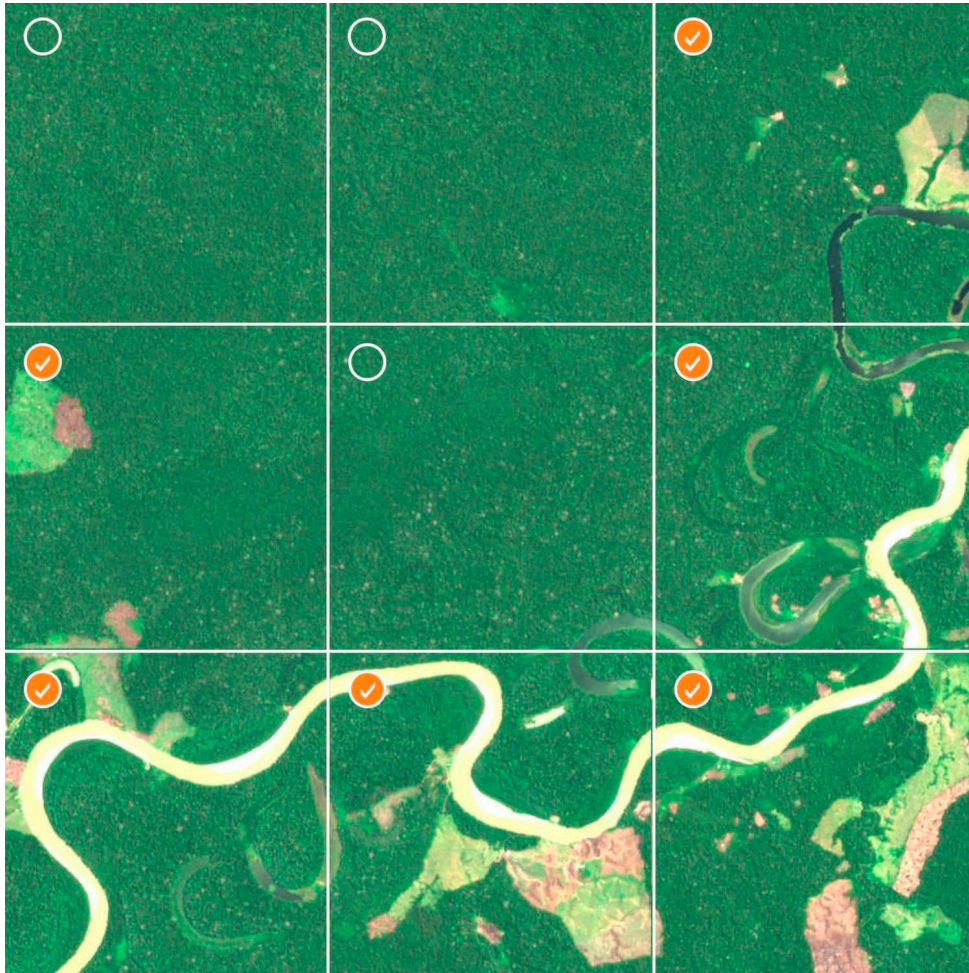

Supplementary Information Figure S1. The crowdsourcing user interface which prompts users to check any images they deem to contain deforestation in a 3x3 window. Unchecked boxes are then assumed to contain no deforestation.

## Examples

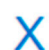

| Human Impact                                                                        | Natural Deforestation                                                                    | Comparisons                                                                          |                                                                                       |
|-------------------------------------------------------------------------------------|------------------------------------------------------------------------------------------|--------------------------------------------------------------------------------------|---------------------------------------------------------------------------------------|
|    |         |    |    |
| Road                                                                                | Roads connecting fields                                                                  | Settlement                                                                           | Fields                                                                                |
|   |        |   |   |
| Roads and fields                                                                    | Clear cuts or existing fields (sun and satellite sensor angle create bright reflectance) | Intentional clearings along a river                                                  | Intentional clearings along a river                                                   |
|  |       |  |  |
| Roads and clearings                                                                 | Road through natural landscape                                                           | Intentional clearings                                                                | Roads and intentional clearings                                                       |

Supplementary Information Figure S2. Example images with descriptions provided for guidance on the deforestation crowdsourcing platform.

## Validation of the Crowd

Supplementary Table S1. Spatial accuracy between the crowd and PRODES deforestation product.

### Confusion Matrix and Statistics

```

      Reference
Prediction 0  1
0      822  38
1      48 155

      Accuracy : 0.9191
      95% CI : (0.901, 0.9348)
No Information Rate : 0.8184
P-Value [Acc > NIR] : <2e-16

      Kappa : 0.7332

McNemar's Test P-Value : 0.3318

      Sensitivity : 0.9448
      Specificity : 0.8031
      Pos Pred Value : 0.9558
      Neg Pred Value : 0.7635
      Prevalence : 0.8184
      Detection Rate : 0.7733
      Detection Prevalence : 0.8090
      Balanced Accuracy : 0.8740

      'Positive' Class : 0
```

Supplementary Table S2. Spatial accuracy between the crowd and global annual tree cover loss product.

```
> (mat2)
```

### Confusion Matrix and Statistics

```

      Reference
Prediction 0  1
0      845  15
1     107  96

      Accuracy : 0.8852
      95% CI : (0.8645, 0.9038)
No Information Rate : 0.8956
P-Value [Acc > NIR] : 0.8748

      Kappa : 0.5508

McNemar's Test P-Value : <2e-16

      Sensitivity : 0.8876
      Specificity : 0.8649
      Pos Pred Value : 0.9826
      Neg Pred Value : 0.4729
      Prevalence : 0.8956
      Detection Rate : 0.7949
      Detection Prevalence : 0.8090
      Balanced Accuracy : 0.8762
```

'Positive' Class : 0

## Deep Learning

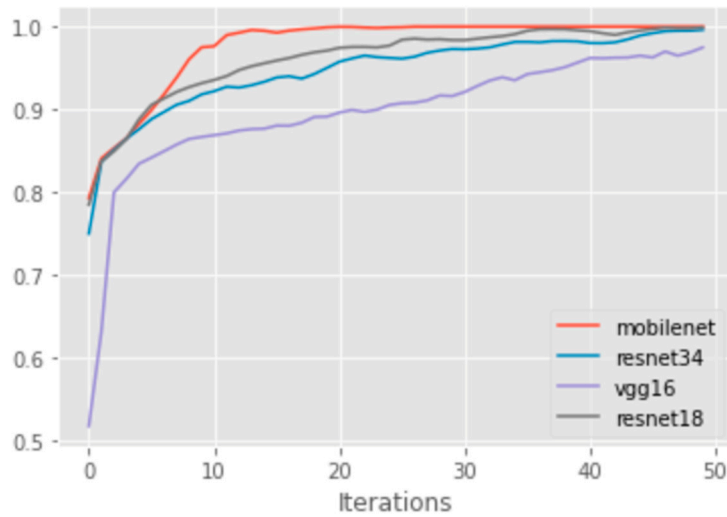

Supplementary Information Figure S3. The mean training-set accuracy achieved by each model architecture computed over five separate trials.

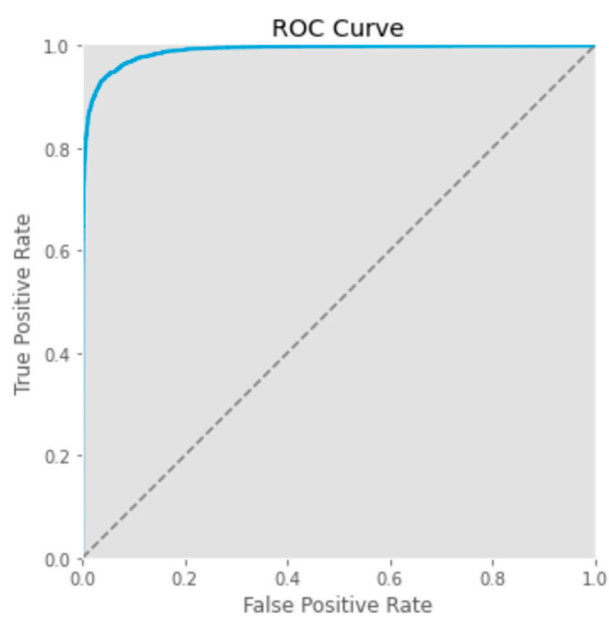

Supplementary Information Figure S4. The Receiver Operating Characteristic curve illustrating the change in true positive and false positive classifications as the threshold for a positive class label is varied. Optimal threshold of 0.39 as determined using Youden's Index is marked in black.



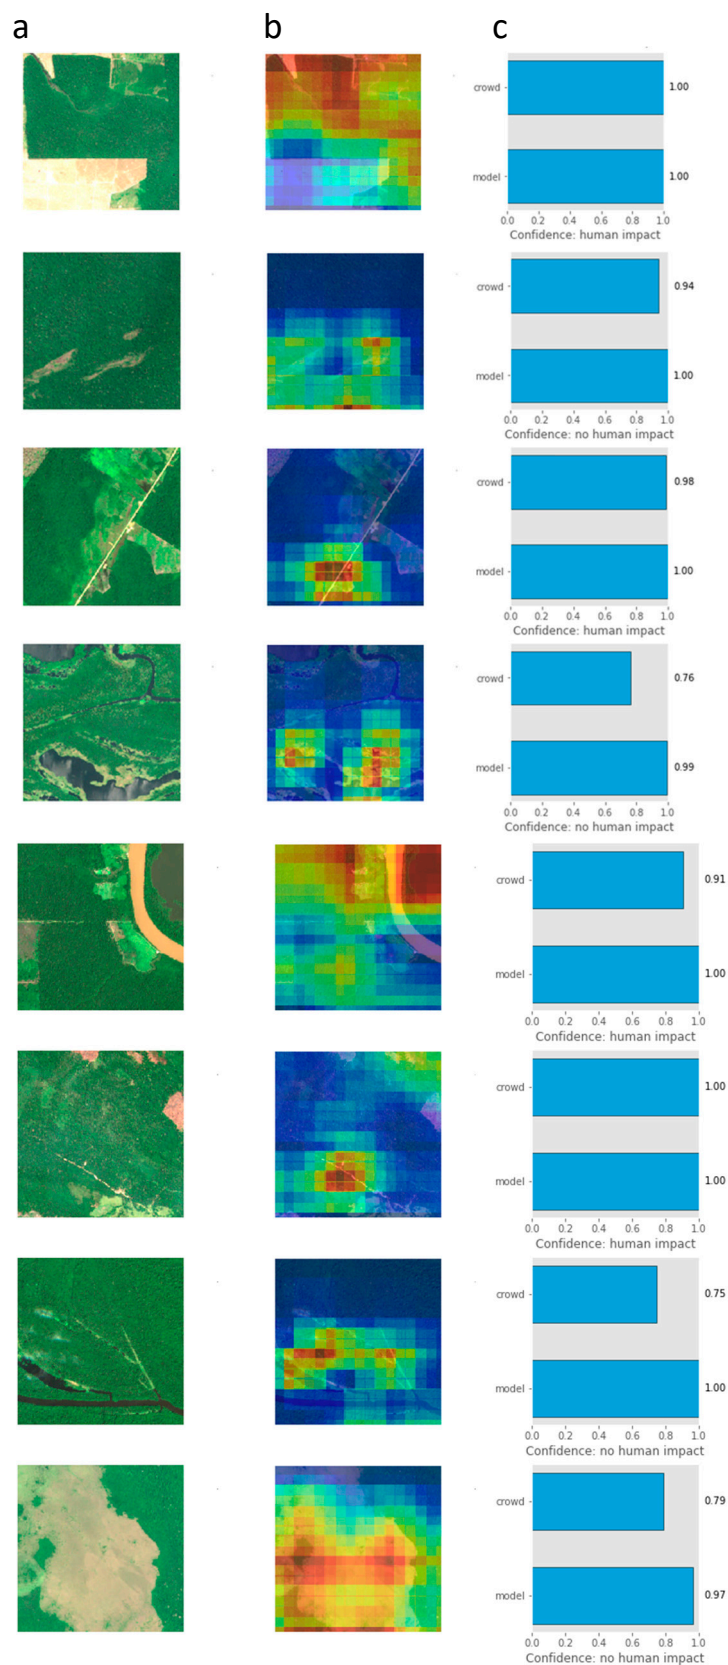

Supplementary Information Figure S5. Examples of deep learning model results for a) eight test dataset images from across the Brazilian Amazon representing signs of deforestation activity and no activity (including natural breaks in the

canopy), b) the resulting activation layers from the model showing which part of the image triggered the classifier (warmer colours imply model activation) and c) the resulting confidence of the crowd and model for deforestation or no deforestation.

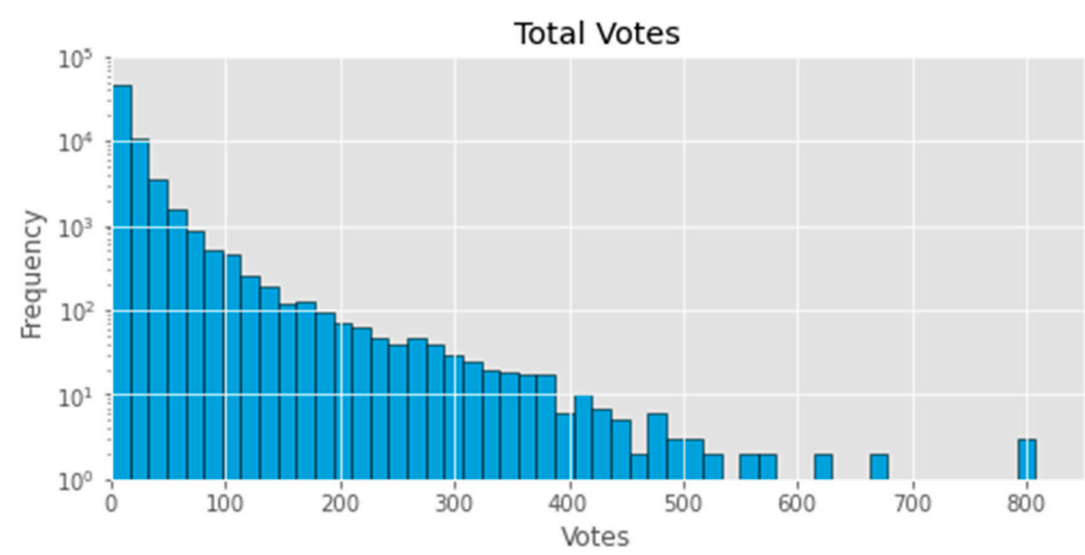

Supplementary Information Figure S6. Frequency with which images require more than six votes before being successfully labeled. Frequency is on a log scale.

Supplementary Table S3. Accuracy of the crowd on a random sample of 200 images.

|              |                 | Crowd Label  |                 |           |
|--------------|-----------------|--------------|-----------------|-----------|
|              |                 | Human Impact | No Human Impact | Undecided |
| Expert Label | Human impact    | 68           | 15              | 5         |
|              | No Human Impact | 2            | 109             | 1         |

Supplementary Table S4. Accuracy of the ResNet18 model on test images.

|             |                 | ResNet18 Label |                 |
|-------------|-----------------|----------------|-----------------|
|             |                 | Human Impact   | No Human Impact |
| Crowd Label | Human impact    | 3282           | 273             |
|             | No Human Impact | 176            | 5043            |



Supplementary Table S5. Spatial accuracy of the crowd-driven AI model prediction compared with global annual tree cover loss over the Peruvian Amazon.

#### Confusion Matrix and Statistics

| Prediction | Reference |    |
|------------|-----------|----|
|            | 0         | 1  |
| 0          | 0         | 0  |
| 1          | 3         | 16 |

Accuracy : 0.8421

95% CI : (0.6042, 0.9662)

No Information Rate : 0.8421

P-Value [Acc > NIR] : 0.6478

Kappa : 0

Mcnemar's Test P-Value : 0.2482

Sensitivity : 0.0000

Specificity : 1.0000

Pos Pred Value : NaN

Neg Pred Value : 0.8421

Prevalence : 0.1579

Detection Rate : 0.0000

Detection Prevalence : 0.0000

Balanced Accuracy : 0.5000

'Positive' Class : 0
